# Solving for X: evidence for sex-specific autism biomarkers across multiple transcriptomic studies

Samuel C. Lee<sup>1,+,\*</sup>, Thomas P. Quinn<sup>1,2,3,+,\*</sup>, Jerry Lai<sup>4</sup>, Sek W. Kong<sup>5</sup>, Irva Hertz-Picciotto<sup>6</sup>, Stephen J. Glatt<sup>7</sup>, Tamsyn M. Crowley<sup>2,3,8</sup>, Svetha Venkatesh<sup>1</sup>, and Thin Nguyen<sup>1</sup>

<sup>1</sup>Centre for Pattern Recognition and Data Analytics (PRaDA), Deakin University, Geelong, 3220, Australia

<sup>2</sup>Centre for Molecular and Medical Research, Deakin University, Geelong, 3220, Australia

<sup>3</sup>Bioinformatics Core Research Group, Deakin University, Geelong, 3220, Australia

<sup>4</sup>Deakin eResearch, Deakin University, Geelong, 3220, Australia | Intersect Australia, Sydney, 2000, Australia

<sup>5</sup>Computational Health Informatics Program, Boston Children's Hospital, Boston, MA, USA | Department of Pediatrics, Harvard Medical School, Boston, MA, USA

<sup>6</sup>Department of Public Health Sciences and UC Davis MIND Institute, School of Medicine, Davis, California

<sup>7</sup>Psychiatric Genetic Epidemiology and Neurobiology Laboratory (PsychGENe Lab) | SUNY Upstate Medical University, Syracuse, NY, USA

<sup>8</sup>Poultry Hub Australia, University of New England, Armidale, New South Wales, 2351, Australia

+ contributed equally, \* [samleenz@me.com](mailto:samleenz@me.com); [contacttomquinn@gmail.com](mailto:contacttomquinn@gmail.com)

## Abstract

Autism spectrum disorder (ASD) is a markedly heterogeneous condition with a varied phenotypic presentation. Its high concordance among siblings, as well as its clear association with specific genetic disorders, both point to a strong genetic etiology. However, the molecular basis of ASD is still poorly understood, although recent studies point to the existence of sex-specific ASD pathophysiologies and biomarkers. Despite this, little is known about how exactly sex influences the gene expression signatures of ASD probands. In an effort to identify sex-dependent biomarkers (and characterise their function), we present an analysis of a single paired-end post-mortem brain RNA-Seq data set and a meta-analysis of six blood-based microarray data sets. Here, we identify several genes with sex-dependent dysregulation, and many more with sex-independent dysregulation. Moreover, through pathway analysis, we find that these sex-independent biomarkers have substantially different biological roles than the sex-dependent biomarkers, and that some of these pathways are ubiquitously dysregulated in both post-mortem brain and blood. We conclude by synthesizing the discovered biomarker profiles with the extant literature, by highlighting the advantage of studying sex-specific dysregulation directly, and by making a call for new transcriptomic data that comprise large female cohorts.

## 1 Introduction

Autism Spectrum Disorder (ASD) is a markedly heterogeneous condition with a varied phenotypic presentation and a spectrum of disability for those affected. As a neurodevelopmental disorder, the ASD syndrome is characterised by social abnormalities, language abnormalities, and stereotyped behavioural patterns [3]. The presence of a genetic link in ASD etiology is well-established [38, 39], first evidenced by ASD concordance among siblings and by a clear association between ASD and specific genetic disorders (e.g., Fragile X mental retardation) [3]. This link has prompted a number of transcriptomic studies (e.g., [20, 17, 19]) to identify gene expression signatures (i.e., as a kind of biomarker) that might help elucidate the etiology of ASD and aid in its diagnosis (an important objective since early diagnosis and therapy is shown to improve outcomes in ASD [13]). However, despite the number of transcriptomic studies performed, the pathophysiology and biomarker profile of ASD are still not known. Rather, these studies have tended to produce inconsistent results, suggesting wide heterogeneity among both the individual patients and the study populations. Indeed, ASD may not have one signature at all, but instead multiple diverging signatures [53].

47 Transcriptomic studies of ASD probands typically use cells collected from either post-mortem  
48 brains or blood in order to estimate the mRNA abundance for thousands of gene transcripts  
49 (by way of microarray technology or massively parallel high-throughput sequencing (RNA-Seq)).  
50 Since many expressed transcripts are a precursor to structural or functional proteins, these studies  
51 can provide an insight into the functional state of a cell, capturing the common pathway for  
52 hereditary predisposition and environmental exposure. Although post-mortem brain studies have  
53 an advantage in that they look directly at the tissue of interest, blood-based studies can identify  
54 clinically useful biomarkers while also serving as a reliable proxy for gene expression in the brain  
55 [55] (though a complete understanding of ASD pathophysiology and its biomarker profile will likely  
56 require careful consideration of both lines of evidence). To date, more than a dozen studies have  
57 measured the transcriptomic profiles of ASD probands (and controls), the results of which have  
58 been summarised by two separate meta-analyses [10, 42] and one “mega-analysis” [53].

59 Sex is often called a risk factor for ASD, and it is stated that the risk for a male to have ASD  
60 is four to five times higher than that for females [56, 11] (although the magnitude of this difference  
61 may be partly due to diagnostic biases [28]). A similar observation, that the increased male  
62 risk is even higher among high-functioning ASD probands [16], likewise suggests that sex-specific  
63 mechanisms could influence ASD pathophysiology and its biomarker profile. Further evidence  
64 for sex-specific mechanisms is found in recent transcriptomic and functional-imaging studies. For  
65 example, Tylee et al., using transformed lymphoblastoid cell lines, found evidence for sex-specific  
66 differential regulation of genes and pathways among ASD probands [52]. Similarly, Trabzuni et  
67 al. found sex-specific differences in alternative splicing in adult human brains, including for a  
68 well-known ASD risk gene NRXN3 [50]. Functional brain connectivity studies using fMRI imaging  
69 have also identified sexual heterogeneity among ASD probands, showing dysregulation in sexually  
70 dimorphic brain regions across two large studies [15, 27]. Taken together, it seems plausible  
71 that sex could interact with other genetic and environmental factors to create sex-specific ASD  
72 pathophysiologies and biomarker profiles.

73 As ASD is more common in males, it suggests that females may have some underlying protection  
74 whereby a higher risk load is required for them to become afflicted [44]. One hypothesis posits that  
75 ASD itself reflects a shift towards “extreme maleness” such that males are necessarily predisposed  
76 [4]. In support of this, females with ASD do harbour more (and larger) copy number variants than  
77 males with ASDs [32], and moreover exhibit differential penetrance given the same genetic etiology  
78 [36]. Unfortunately, however, the increased prevalence of ASD in males has led to the exclusion  
79 of females from many transcriptomic studies (e.g., [21, 45, 1]), making it difficult to understand  
80 the male skew in ASD prevalence. Indeed, individual studies are often underpowered to detect  
81 subtle sex-specific differences (if they contain female subjects at all). When female subjects are  
82 included, sex is typically modelled as a simple covariate rather than an interaction term (i.e. the  
83 ASD-sex interaction), meaning that only sex-independent (and not sex-dependent) biomarkers are  
84 discovered. When male ASD is contrasted with female ASD, it typically involves loosely comparing  
85 simple sex-specific differences (e.g., differential expression present in males but not females, and  
86 *vice versa*) in a statistically anticonservative manner. To our knowledge, no study has looked  
87 at whether gene expression signatures show a sex-autism interaction across multiple studies and  
88 human tissues.

89 Using a single paired-end post-mortem brain RNA-Seq data set and a meta-analysis of six blood-  
90 based microarray data sets, we present a analysis of transcriptomic data that focuses on comparing  
91 sex-dependent and sex-independent ASD biomarkers (and the functional profiles thereof) across  
92 multiple tissues. By modelling the interaction of sex and ASD directly, we identify biomarkers (as  
93 well as functional pathways) that show sex-differences in ASD probands that are different than  
94 those in control subjects. Then, for those biomarkers that show no interaction, we pool male and  
95 female probands for a secondary sex-independent analysis. Our results suggest that, despite low  
96 power, some genes have FDR-adjusted significant sex-dependent interactions, while even more have  
97 significant sex-independent main effects. Subsequent pathway analysis further shows that these  
98 sex-independent biomarkers have substantially different biological roles than the sex-dependent  
99 biomarkers, and that some of these pathways are ubiquitously dysregulated in both post-mortem  
100 brain and blood.

## 2 Methods

### 2.1 Data acquisition

#### 2.1.1 RNA-Seq data

We searched for relevant publicly available RNA-Seq data using the Gene Expression Omnibus (GEO) [5] with the term ("expression profiling by high throughput sequencing"[DataSet Type] AND ("autism spectrum disorder"[MeSH Terms] OR "autistic disorder"[MeSH Terms])) AND "homo sapiens"[Organism] (query made January 2018). We restricted eligible data sets to those sequenced with paired-end and non-poly-A-selected libraries. After excluding any data sets that used cell lines or did not have female cases, only one experiment, GSE107241 [57], remained. These data comprise a RiboZero Gold paired-end RNA-Seq data set from 52 postmortem dorsolateral prefrontal cortex tissue samples.

Prior to alignment and quantification, raw RNA-Seq reads were trimmed using Trimmomatic (docker image quay.io/biocontainers/trimmomatic:0.36-4) [9] and quality control metrics were recorded (before and after trimming) using FastQC (docker image biocontainers/fastqc:0.11.5) [2]. We aligned trimmed reads and quantified expression using Salmon (docker image combinelab/salmon:0.9.0) [43] as run in pseudo-quantification mode with a k-mer index of length 31. For the reference, we concatenated a human coding reference (i.e., GRCh38.90.cds) with the corresponding non-coding reference (i.e., GRCh38.90.ncrna).

#### 2.1.2 Microarray data

We collected multiple microarray data sets to perform a meta-analysis of sex-autism interactions and main effects of ASD (i.e., sex-independent effects, where males and females are pooled). We referenced two prior meta-analyses [10, 42], and one "mega-analysis" [53], to prepare a list of data sets to study. Of these data sets, we excluded any study that (a) measured transcript expression from brain tissue, (b) had no female cases, (c) used cell lines (i.e., GSE37772 and GSE43076), or (d) treated cells with PPA (i.e., GSE32136). Six data sets remained after exclusion, as described in Table 1.

Data acquired from the Gene Expression Omnibus (GEO) [5] (i.e., GSE6575 [18] and GSE18123 [26]) were acquired already normalised and were not modified further. The other data sets (i.e., the Glatt et al. Wave I and Wave II data [17], the CHARGE study data [20], and the Kong et al. 2013 data [25]) each underwent RMA normalization, quantile normalization, and base-2 logarithm transformation. All subjects with a labelled condition other than typically developed (TD) were assigned to the autism spectrum disorder (ASD) group, except for the two Glatt et al. data sets where "Type-1 errors" were assigned to the TD group. Note that, in crafting this dichotomy, some subjects assigned to the ASD group have delays that fall outside of the "spectrum" *per se*.

### 2.2 Differential expression analysis of RNA-Seq data

We used DESeq2 (Version 3.6) [37] to test for differential transcript expression within the Salmon-generated counts. We applied a conservative expression filter (i.e., at least 10 estimated counts per-gene in every sample) to the raw count matrix to ensure that the high variability of lowly expressed transcripts did not bias results due to the small group sizes. For each transcript that passed the expression filter, a model was fit using the formula  $\sim \text{ASD} * \text{Sex} + \text{Age}$  (where Age is the age of death). Interaction and sex-independent main effects (i.e., of the ASD condition) were then extracted from the model by specifying the relevant contrasts to the DESeq2::results function. We corrected for multiple testing using the Benjamini-Hochberg procedure [7].

### 2.3 Meta-analysis of microarray data

Before proceeding with the meta-analysis, we established a set of probes (i.e., for each microarray platform) that represent genes also represented by probes in the other platforms. In other words, we established a final probe set based on the intersection of unique gene symbols present in all microarray platforms under study. Note that we resolved one-to-many mapping ambiguities by excluding any probe that mapped to multiple gene symbols.

For each microarray data set, and for each probe (i.e., of those representing genes found in all data sets), we performed differential expression analysis using limma (Version 3.34) [46], applying

152 the following steps: (1) fit a model with the formula  $\sim \text{ASD} * \text{Sex} + \text{Age}$  where ASD and Sex are  
153 each two-level factors (except GSE6575, where the Age covariate is unknown), (2) define contrasts  
154 for the sex-autism interaction and for the sex-independent main effects (i.e., of the ASD condition),  
155 and (3) measure the differential expression for each contrast using the eBayes procedure.

156 Next, we transformed platform-specific probe p-values to HGNC symbol p-values using An-  
157 notationDbi (available from Bioconductor [22]). We resolved many-to-one mapping ambiguities  
158 by FDR-adjusting the minimum p-value of all probes for a given gene symbol (i.e., calculating a  
159 within-gene FDR correction). We then used Fisher's method to perform a meta-analysis of the  
160 p-values obtained from the differential expression analysis. For  $K$  studies, Fisher's method scores  
161 each gene based on (negative two times) the sum of the logarithm of the p-values:

$$\chi_{2K}^2 = -2 \sum_i^K \log p_i \quad (1)$$

162 This score follows a  $\chi^2$  distribution with  $2K$  degrees of freedom [41]. Thus, for each gene, we  
163 computed a p-value directly from this score. We corrected for multiple testing using the Benjamini-  
164 Hochberg procedure [7].

## 165 2.4 Adjustment of latent batch effects

166 To ensure that latent batch effects did not inflate the discovery of false positives, we performed  
167 all analyses above with adjustment for batch effects using *sva* (Version 3.26) [31, 30], applying  
168 the following steps: (1) estimate the number of surrogate variables while specifying the  $\text{ASD}$   
169  $* \text{Sex}$  interaction as the variable of interest and *Age* as an adjustment variable, (2) use the *sva*  
170 function (or, in the case of *Salmon*-generated counts, the *svaseq* function) to estimate the surrogate  
171 variables, and (3) include the surrogate variables in the differential expression model(s) described  
172 above. Generally speaking, using *sva* yielded more conservative results than not using *sva*. All  
173 tables and figures show results generated with *sva* except where otherwise noted.

## 174 2.5 Pathway analysis and knowledge integration

175 We performed pathway analysis using GSEA (Version 3.0) [48] in PreRanked mode with classic en-  
176 richment and 1,000 permutations. Enrichment scores were calculated for specific MSigDB (Version  
177 6.1) [47, 34] gene sets, including the curated KEGG (*c2.cp.kegg*[23]), Gene Ontology Biological  
178 Process (*c5.bp*) [49], Reactome (*c2.cp.reactome*) [14], and MSigDB Hallmark (*h.all*) [35] sets.

179 Based on the nature of the analyses, input rank lists were prepared differently for the RNA-Seq  
180 and microarray results. For the RNA-Seq analysis, we ranked transcripts based on the p-value,  $p$ ,  
181 and the magnitude of the fold-change, FC:

$$\text{Rank} = -\log_{10}(p) \times \text{sign}(\log_2(\text{FC})) \quad (2)$$

182 Then, these transcript-level ranks were converted into gene-level ranks based on the top transcript-  
183 level rank. For the microarray meta-analysis, we ranked genes using the  $\chi^2$  test statistic (as  
184 calculated from Fisher's method). Note that since this latter metric is agnostic to the direction of  
185 expression changes, we focused here on pathways enriched with a positive score (effectively making  
186 this pathway enrichment test one-tailed).

# 187 3 Results

## 188 3.1 Evidence for sex-dependent autism biomarkers

189 By modelling the sex-autism interaction directly, we can detect gene expression signatures that  
190 have differential dysregulation in male ASD probands when compared with female ASD probands.  
191 In other words, we can find sexually dimorphic ASD biomarkers (e.g., a gene up-regulated in male  
192 ASD but not in female ASD, or *vice versa*). Despite small study sizes (and disproportionately  
193 fewer females), we find some evidence for a sex-autism interaction among biomarkers, especially  
194 throughout the microarray meta-analysis data.

195 From the analysis of the RNA-Seq data derived from post-mortem brain tissue, we find no tran-  
196 scripts with significant (FDR-adjusted p-value < 0.05) sex-dependent dysregulation, although one

197 of these transcripts showed a significant interaction prior to batch correction with *sva*. To illustrate  
198 what a sex-autism interaction might look like, Figure 1 shows the per-group expression profiles  
199 for the two transcripts with the largest interaction effect (i.e., those with the smallest corrected  
200 p-value). Table 2 characterises those transcripts with the most sex-dependent dysregulation.

201 From the meta-analysis of the blood-based microarray data, we find two genes with significant  
202 (FDR-adjusted) sex-dependent dysregulation: *TTF2* and *UTY*. Table 3 characterises those genes  
203 with the most sex-dependent dysregulation. Since for a meta-analysis by Fisher's method, a large  
204 departure from the null (i.e., a very small p-value) in only one of several studies could cause  
205 the meta-analysis to post a significant result (i.e., even after FDR-adjustment) [51], it is useful  
206 to inspect visually how each study contributed to the results of the meta-analysis. For this,  
207 Figure 2 shows how each study contributed to the meta-analysis findings by plotting the aggregate  
208 Fisher score for each gene (of those with large sex-dependent dysregulation) along with the study-  
209 wise nominal significance (unadjusted p-value < 0.05). Notably, several of the most significantly  
210 dysregulated genes are at least nominally significant in more than one study.

### 211 3.2 Evidence for sex-independent autism biomarkers

212 In situations where a sex-autism interaction is not detectable, we can proceed to measure main  
213 condition (i.e., sex-independent) effects by pooling male ASD probands with female ASD probands  
214 (and male controls with female controls), without having to model sex as a covariate. Genes with  
215 significant sex-independent main effects (i.e., of the ASD condition) have large unidirectional effect  
216 sizes in male ASD probands, female ASD probands, or both. Yet, because the interaction is tested  
217 first, we can interpret the main condition effects as sex-independent.

218 From the analysis of the RNA-Seq data derived from post-mortem brain tissue, we find seven  
219 transcripts with significant (FDR-adjusted p-value < 0.05) sex-independent differential expression.  
220 Of these, only one transcript showed significant up-regulation in ASD. Figure 3 shows the expres-  
221 sion profile for the two transcripts with the most significant sex-independent main effects (i.e., of  
222 the ASD condition). Table 4 characterises those transcripts with significant sex-independent dys-  
223 regulation. Interestingly, several of the transcripts called differentially expressed by the analysis  
224 are annotated as non-coding RNA species.

225 From the meta-analysis of blood-based microarray data, we find 21 genes with significant (FDR-  
226 adjusted) sex-independent dysregulation. Table 5 characterises those genes with the most sex-  
227 independent dysregulation. As in Figure 2, Figure 4 shows how each study contributed to the  
228 meta-analysis findings by plotting the aggregate Fisher score for each gene (i.e., of those with large  
229 sex-independent dysregulation) along with the study-wise nominal significance (unadjusted p-value  
230 < 0.05). Again, most genes selected as statistically significant by the meta-analysis are at least  
231 nominally significant in more than one study.

### 232 3.3 Pathway enrichment of ASD biomarkers

233 In an effort to summarise the biological relevance of the biomarker profiles generated above, we used  
234 the complete ranked lists of the differentially expressed transcripts (and genes) in four separate  
235 gene set enrichment analyses to identify common differentially regulated pathways. Four enrich-  
236 ment profiles were generated using the sex-dependent RNA-Seq (brain) biomarkers, sex-independent  
237 RNA-Seq (brain) biomarkers, sex-dependent microarray (blood) biomarkers, and sex-independent  
238 microarray (blood) biomarkers.

239 Figure 5 shows the KEGG pathways enriched by the biomarkers as ranked by the analysis of  
240 the RNA-Seq data. For the sex-dependent biomarkers, nine pathways showed significant (FDR-  
241 adjusted p-value < 0.15) enrichment. For the sex-independent biomarkers, five pathways showed  
242 significant enrichment. Interestingly, all significant enrichment occurred in the same direction.

243 Figure 6 shows the KEGG pathways enriched by the biomarkers as ranked by the analysis of  
244 the microarray data. For the sex-dependent biomarkers, one pathway (i.e., Alanine Aspartate and  
245 Glutamate Metabolism) showed significant (FDR-adjusted p-value < 0.30) enrichment. For the  
246 sex-independent biomarkers, thirty-six pathways showed significant enrichment. Note that because  
247 only positive (i.e., one-tailed) enrichments are considered for these data, an FDR-adjusted p-value  
248 < 0.30 is used here (see Methods for more details).

249 Figure 7 compares the overlap between these significant pathways. For the sex-dependent  
250 analyses, no pathways are enriched in both the RNA-Seq and microarray data. However, for the  
251 sex-independent analyses, two pathways are enriched in both data. Interestingly, this agreement



252 exists despite differences in the ranked lists, suggesting that ASD biomarker profiles may show  
253 some degree of higher-order conservation at the pathway-level that exists not only across multiple  
254 studies, but across multiple tissues (as well as multiple transcript quantification assays). Note  
255 that we also tested for enrichment among the Gene Ontology Biological Process, Reactome, and  
256 MSigDB Hallmarks gene sets, all of which show more examples of overlap between the separate  
257 sex-independent analyses (see the Supplementary Information for more details).

## 258 4 Discussion

259 In this report, we present an analysis of several ASD transcriptomic studies, including an analysis of  
260 RNA-Seq data derived from post-mortem brain and a meta-analysis of six blood-based microarray  
261 data sets. Specifically, we focus on identifying both sex-dependent and sex-independent biomarker  
262 profiles for ASD by modelling the sex-autism interaction directly and secondarily measuring main  
263 effects of the ASD condition (i.e., sex-independent effects where males and females are pooled). In  
264 addition to identifying transcript (and gene) biomarkers, we use gene set enrichment analysis to  
265 summarise the observed dysregulation at the pathway level, contrasting sex-dependent pathway  
266 enrichment with sex-independent pathway enrichment. In doing so, we find evidence that ASD  
267 biomarker profiles may show some degree of higher-order conservation at the pathway level that  
268 exists not only across multiple studies, but across multiple tissues (and across multiple transcript  
269 quantification assays).

270 Despite small sample sizes in all studies, we found evidence for the existence of some sex-  
271 dependent biomarkers in human tissue. The meta-analysis identified two genes, *TTF2* and *UTY*,  
272 with sexually dimorphic expression in the blood. One of these, *TTF2*, plays an important role in  
273 normal thyroid development [12]. Interestingly, a loss of thyroid hormone homeostasis has been  
274 linked to ASD [8, 24]. Since it is well-known that thyroid diseases have a sex-specific presentation  
275 [6], it seems plausible that thyroid abnormalities could contribute to a sexually dimorphic ASD  
276 signature. The other, *UTY*, is a Y-chromosome gene, making any interpretation of its differential  
277 dysregulation difficult. Two other genes, *KCNJ8* and *MAP1B*, had FDR-adjusted p-values very  
278 close to the pre-defined significance cutoff, warranting follow-up in another study. Although the  
279 RNA-Seq analysis did not yield any significant interactions, it is not surprising considering this  
280 data set contained only three female ASD probands. Nevertheless, the large (albeit non-significant)  
281 effect sizes warrant repeat studies with bigger cohorts and more female ASD probands.

282 By modelling the sex-autism interaction directly, we are able to follow-up the sex-dependent  
283 analysis with a secondary sex-independent analysis for any transcript (or gene) whose expression  
284 did not significantly interact with sex. In this scenario, we contrast the pooled male ASD probands  
285 and female ASD probands against the pooled male controls and female controls to calculate the  
286 main effects (which we can thus interpret as sex-independent biomarkers). Here, over twenty  
287 transcripts and genes exceeded the threshold for FDR-adjusted significance. Interestingly, for the  
288 RNA-Seq data, several of the significant biomarkers are not protein-coding genes (highlighting the  
289 value of using non-poly-A-selected libraries to quantify both coding and non-coding transcripts).  
290 For the microarray meta-analysis, several of the sex-independent biomarkers are associated with  
291 key neurodevelopmental processes, including some X-chromosome genes. For example, *MAGED2*,  
292 differentially expressed in ASD probands, is located on an X-linked intellectual disability hotspot  
293 (i.e., Xp11.2) [29, 40] (which, if causally relevant, could contribute to the male risk bias).

294 For both the RNA-Seq analysis and the microarray meta-analysis, we tested the ranked sex-  
295 dependent and sex-independent biomarker profiles separately for pathway-level enrichment. We  
296 found some pathway enrichment for the sex-dependent profiles, and even more for the sex-independent  
297 profiles. Importantly, very few of the enriched pathways were the same for both the interaction  
298 and main effects. This suggests that males and females exhibit unique pathway-level signatures  
299 that, if causally relevant, might further suggest the existence of both sex-specific and common ASD  
300 pathophysiologies. Although few KEGG pathways are enriched among the sex-dependent results,  
301 there are dozens of significantly enriched sex-dependent pathways across other tested gene sets  
302 (see Supplementary Information for more details). Among the sex-independent enriched pathways  
303 (for the meta-analysis results), there are a number of pathways for known neurodevelopmental  
304 and neurodegenerative diseases, including Huntingtons, Parkinsons, Alzheimers, and amyotrophic  
305 lateral sclerosis (ALS), suggesting that at least some of these ASD biomarkers may have functions  
306 important to general brain health. Considering that both unique and shared signatures (i.e., at the  
307 biomarker-level and pathway-level) exist among ASD probands, it seems plausible that molecular

308 diagnostics could benefit from modelling sex-specific processes directly.

309 Although we found pathway enrichment to differ considerably between the sex-dependent and  
310 sex-independent biomarker profiles, we found that several sex-independent pathways (i.e., based  
311 on KEGG and other genes sets) were enriched across both the RNA-Seq and microarray data.  
312 Interestingly, this overlap exists despite the fact that analyses were performed on different human  
313 tissues (and with different transcript quantification assays). In fact, more than fifty Gene Ontology  
314 pathways were enriched among both sets of ranked sex-independent biomarkers (even though no  
315 gene products showed significant differential expression in both data). This overlap supports the  
316 hypothesis that there may exist common diagnostic (and perhaps etiological) signatures across the  
317 widely heterogeneous population of ASD probands. If true, it seems plausible that molecular diag-  
318 nostics could further benefit from modelling pathway-level dysregulation directly (i.e., in addition  
319 to modelling conventional transcriptomic biomarkers).

320 When we compare our pathway enrichments to the previous ASD “mega-analysis” pathway  
321 enrichments [54], we observe several complementary results. First, we found positive enrichment  
322 of the MAPK pathway in our sex-dependent RNA-Seq results, agreeing with the male-specific  
323 enrichment of Mek targets found in the Tylee et al. study [54]. Second, we found an enrichment of  
324 the ribosome-related pathway in both of our sex-independent analyses, agreeing with the ribosome-  
325 related pathway enrichment identified by the sex-independent “mega-analysis” [54]. Third, we  
326 found an enrichment of the Toll-like receptor (TLR) signalling pathway in our sex-independent  
327 meta-analysis results, agreeing with the TLR 3 and 4 signalling pathway enrichment identified by  
328 the sex-independent “mega-analysis” [54]. Importantly, these complementary results exist despite  
329 considerable differences in statistical methodology and data set inclusion.

330 Our analysis is not without limitations. First, although we used *sva* to adjust for latent batch  
331 effects, it is still possible that any number of remaining factors (or batch effects) could coincide with  
332 the diagnostic label (e.g., undocumented co-morbidities or medication use), thereby confounding  
333 the discovered biomarker profile. Second, as with any observational study, it is impossible to con-  
334 clude whether the gene expression signatures (and their biological pathways) are causally related  
335 to ASD (or, likewise, the sex-autism interaction). Third, this analysis is likely under-powered to  
336 detect both sex-autism interactions and main effects, owing to the small sample sizes and dispro-  
337 portionately smaller female cohorts. Yet, based on the extant literature (which clearly highlights  
338 sex as an ASD risk factor) and the results published here, we believe that modelling the sex-autism  
339 interaction should become a mainstay of ASD transcriptomic research. Advantageously, as shown  
340 here, interaction modelling is compatible with the most commonly used softwares for batch-effect  
341 correction [31], RNA-Seq analysis [37], and microarray analysis [46]. Yet, this analytical technique  
342 cannot offer any benefit if transcriptomic studies continue to systematically exclude female subjects  
343 ([21, 45, 1]). Although there seems to exist a strong skew in the prevalence of male ASD, this very  
344 fact underlies the importance of studying female ASD at equal proportions: a complete under-  
345 standing of the molecular basis of ASD will require the intentional study of both sex-dependent  
346 and sex-independent mechanisms, as well as their differences and commonalities.

## 347 5 Acknowledgements

348 This research was partially supported by the Australian Government through the Australian Re-  
349 search Council’s Linkage Projects funding scheme (project LP140100240). SWK is supported by  
350 a grant from the National Institute of Health (R01MH107205).

## 351 References

- 352 [1] Mark D. Alter, Rutwik Kharkar, Keri E. Ramsey, David W. Craig, Raun D. Melmed,  
353 Theresa A. Grebe, R. Curtis Bay, Sharman Ober-Reynolds, Janet Kirwan, Josh J. Jones,  
354 J. Blake Turner, Rene Hen, and Dietrich A. Stephan. Autism and increased paternal age re-  
355 lated changes in global levels of gene expression regulation. *PloS One*, 6(2):e16715, February  
356 2011.
- 357 [2] S Andrews. FastQC a Quality Control Tool for High Throughput Sequence Data [Online],  
358 2010.

- 359 [3] A. Bailey, W. Phillips, and M. Rutter. Autism: towards an integration of clinical, genetic,  
360 neuropsychological, and neurobiological perspectives. *Journal of Child Psychology and Psy-*  
361 *chiatry, and Allied Disciplines*, 37(1):89–126, January 1996.
- 362 [4] Simon Baron-Cohen. The extreme male brain theory of autism. *Trends in cognitive sciences*,  
363 6(6):248–254, 6 2002.
- 364 [5] Tanya Barrett and Ron Edgar. Gene Expression Omnibus (GEO): Microarray data storage,  
365 submission, retrieval, and analysis. *Methods in enzymology*, 411:352–369, 2006.
- 366 [6] Michael Bauer, Tasha Glenn, Maximilian Pilhatsch, Andrea Pfennig, and Peter C Whybrow.  
367 Gender differences in thyroid system function: relevance to bipolar disorder and its treatment.  
368 *Bipolar Disorders*, 16(1):58–71, 2 2014.
- 369 [7] Yoav Benjamini and Yosef Hochberg. Controlling the False Discovery Rate: A Practical and  
370 Powerful Approach to Multiple Testing. *Journal of the Royal Statistical Society. Series B*  
371 *(Methodological)*, 57(1):289–300, 1995.
- 372 [8] Pere Berbel, Daniela Navarro, and Gustavo C Román. An evo-devo approach to thyroid  
373 hormones in cerebral and cerebellar cortical development: etiological implications for autism.  
374 *Frontiers in endocrinology*, 5:146, 2014.
- 375 [9] Anthony M. Bolger, Marc Lohse, and Bjoern Usadel. Trimmomatic: A flexible trimmer for  
376 Illumina sequence data. *Bioinformatics*, 30(15), 2014.
- 377 [10] Carolyn Ch’ng, Willie Kwok, Sanja Rogic, and Paul Pavlidis. Meta-Analysis of Gene Expres-  
378 sion in Autism Spectrum Disorder. *Autism Research*, 8(5):593–608, 10 2015.
- 379 [11] Deborah L. Christensen, Jon Baio, Kim Van Naarden Braun, Deborah Bilder, Jane Charles,  
380 John N. Constantino, Julie Daniels, Maureen S. Durkin, Robert T. Fitzgerald, Margaret  
381 Kurzius-Spencer, Li-Ching Lee, Sydney Pettygrove, Cordelia Robinson, Eldon Schulz, Chris  
382 Wells, Martha S. Wingate, Walter Zahorodny, and Marshalyn Yeargin-Allsopp. Prevalence  
383 and Characteristics of Autism Spectrum Disorder Among Children Aged 8 Years — Autism  
384 and Developmental Disabilities Monitoring Network, 11 Sites, United States, 2012. *MMWR.*  
385 *Surveillance Summaries*, 65(3):1–23, 4 2016.
- 386 [12] Mario De Felice and Roberto Di Lauro. Thyroid Development and Its Disorders: Genetics  
387 and Molecular Mechanisms. *Endocrine Reviews*, 25(5):722–746, 10 2004.
- 388 [13] Jennifer Harrison Elder, Consuelo Maun Kreider, Susan N Brasher, and Margaret Ansell.  
389 Clinical impact of early diagnosis of autism on the prognosis and parent-child relationships.  
390 *Psychology research and behavior management*, 10:283–292, 2017.
- 391 [14] Antonio Fabregat, Steven Jupe, Lisa Matthews, Konstantinos Sidiropoulos, Marc Gillespie,  
392 Phani Garapati, Robin Haw, Bijay Jassal, Florian Korninger, Bruce May, Marija Milacic, Co-  
393 rina Duenas Roca, Karen Rothfels, Cristoffer Sevilla, Veronica Shamovsky, Solomon Shorser,  
394 Thawfeek Varusai, Guilherme Viteri, Joel Weiser, Guanming Wu, Lincoln Stein, Henning  
395 Hermjakob, and Peter D’Eustachio. The Reactome Pathway Knowledgebase. *Nucleic Acids*  
396 *Research*, 46(D1):D649–D655, 1 2018.
- 397 [15] Dorothea L. Floris, Meng-Chuan Lai, Tanmay Nath, Michael P. Milham, and Adriana Di Mar-  
398 tino. Network-specific sex differentiation of intrinsic brain function in males with autism.  
399 *Molecular Autism*, 9(1):17, 12 2018.
- 400 [16] E Fombonne. The epidemiology of autism: a review. *Psychological medicine*, 29(4):769–86, 7  
401 1999.
- 402 [17] Stephen J. Glatt, Ming T. Tsuang, Mary Winn, Sharon D. Chandler, Melanie Collins, Linda  
403 Lopez, Melanie Weinfeld, Cindy Carter, Nicholas Schork, Karen Pierce, and Eric Courchesne.  
404 Blood-based gene expression signatures of infants and toddlers with autism. *Journal of the*  
405 *American Academy of Child and Adolescent Psychiatry*, 51(9):934–944.e2, September 2012.
- 406 [18] Jeffrey P. Gregg, Lisa Lit, Colin A. Baron, Irva Hertz-Picciotto, Wynn Walker, Ryan A.  
407 Davis, Lisa A. Croen, Sally Ozonoff, Robin Hansen, Isaac N. Pessah, and Frank R. Sharp.  
408 Gene expression changes in children with autism. *Genomics*, 91(1):22–29, January 2008.



- 409 [19] Simone Gupta, Shannon E. Ellis, Foram N. Ashar, Anna Moes, Joel S. Bader, Jianan Zhan,  
410 Andrew B. West, and Dan E. Arking. Transcriptome analysis reveals dysregulation of innate  
411 immune response genes and neuronal activity-dependent genes in autism. *Nature Communi-*  
412 *cations*, 5:5748, December 2014.
- 413 [20] Irva Hertz-Picciotto, Lisa A. Croen, Robin Hansen, Carrie R. Jones, Judy van de Water, and  
414 Isaac N. Pessah. The CHARGE study: an epidemiologic investigation of genetic and environ-  
415 mental factors contributing to autism. *Environmental Health Perspectives*, 114(7):1119–1125,  
416 July 2006.
- 417 [21] Valerie W. Hu, Tawarit Sarachana, Kyung Soon Kim, AnhThu Nguyen, Shreya Kulkarni,  
418 Mara E. Steinberg, Truong Luu, Yinglei Lai, and Norman H. Lee. Gene expression profiling  
419 differentiates autism case-controls and phenotypic variants of autism spectrum disorders: ev-  
420 idence for circadian rhythm dysfunction in severe autism. *Autism Research: Official Journal*  
421 *of the International Society for Autism Research*, 2(2):78–97, April 2009.
- 422 [22] Wolfgang Huber, Vincent J Carey, Robert Gentleman, Simon Anders, Marc Carlson, Benil-  
423 ton S Carvalho, Hector Corrada Bravo, Sean Davis, Laurent Gatto, Thomas Girke, Raphael  
424 Gottardo, Florian Hahne, Kasper D Hansen, Rafael A Irizarry, Michael Lawrence, Michael I  
425 Love, James MacDonald, Valerie Obenchain, Andrzej K Oleś, Hervé Pagès, Alejandro Reyes,  
426 Paul Shannon, Gordon K Smyth, Dan Tenenbaum, Levi Waldron, and Martin Morgan. Or-  
427 chestrating high-throughput genomic analysis with Bioconductor. *Nature Methods*, 12(2):115–  
428 121, 2 2015.
- 429 [23] Minoru Kanehisa, Miho Furumichi, Mao Tanabe, Yoko Sato, and Kanae Morishima. KEGG:  
430 New perspectives on genomes, pathways, diseases and drugs. *Nucleic Acids Research*,  
431 45(D1):D353–D361, 2017.
- 432 [24] A Khan, J W Harney, A M Zavacki, and E M Sajdel-Sulkowska. Disrupted brain thyroid  
433 hormone homeostasis and altered thyroid hormone-dependent brain gene expression in autism  
434 spectrum disorders. *Journal of physiology and pharmacology : an official journal of the Polish*  
435 *Physiological Society*, 65(2):257–72, 4 2014.
- 436 [25] S. W. Kong, Y. Shimizu-Motohashi, M. G. Campbell, I. H. Lee, C. D. Collins, S. J. Brewster,  
437 I. A. Holm, L. Rappaport, I. S. Kohane, and L. M. Kunkel. Peripheral blood gene expres-  
438 sion signature differentiates children with autism from unaffected siblings. *Neurogenetics*,  
439 14(2):143–152, May 2013.
- 440 [26] Sek Won Kong, Christin D. Collins, Yuko Shimizu-Motohashi, Ingrid A. Holm, Malcolm G.  
441 Campbell, In-Hee Lee, Stephanie J. Brewster, Ellen Hanson, Heather K. Harris, Kathryn R.  
442 Lowe, Adrianna Saada, Andrea Mora, Kimberly Madison, Rachel Hundley, Jessica Egan,  
443 Jillian McCarthy, Ally Eran, Michal Galdzicki, Leonard Rappaport, Louis M. Kunkel, and  
444 Isaac S. Kohane. Characteristics and predictive value of blood transcriptome signature in  
445 males with autism spectrum disorders. *PLoS One*, 7(12):e49475, 2012.
- 446 [27] M.-C. Lai, M. V. Lombardo, J. Suckling, A. N. V. Ruigrok, B. Chakrabarti, C. Ecker, S. C. L.  
447 Deoni, M. C. Craig, D. G. M. Murphy, E. T. Bullmore, and S. Baron-Cohen. Biological sex  
448 affects the neurobiology of autism. *Brain*, 136(9):2799–2815, 9 2013.
- 449 [28] Meng-Chuan Lai, Michael V Lombardo, Bonnie Auyeung, Bhisadev Chakrabarti, and Si-  
450 mon Baron-Cohen. Sex/gender differences and autism: setting the scene for future research.  
451 *Journal of the American Academy of Child and Adolescent Psychiatry*, 54(1):11–24, 1 2015.
- 452 [29] K. Langnaese, D.U. Kloos, M. Wehnert, B. Seidel, and P. Wieacker. Expression pattern  
453 and further characterization of human MAGED2 and identification of rodent orthologues.  
454 *Cytogenetic and Genome Research*, 94(3-4):233–240, 2001.
- 455 [30] Jeffrey T. Leek. svaseq: removing batch effects and other unwanted noise from sequencing  
456 data. *Nucleic Acids Research*, 42(21):e161–e161, 12 2014.
- 457 [31] Jeffrey T. Leek, W. Evan Johnson, Hilary S. Parker, Andrew E. Jaffe, and John D. Storey.  
458 The sva package for removing batch effects and other unwanted variation in high-throughput  
459 experiments. *Bioinformatics*, 28(6):882–883, March 2012.

- 460 [32] Dan Levy, Michael Ronemus, Boris Yamrom, Yoon-ha Lee, Anthony Leotta, Jude Kendall,  
461 Steven Marks, B. Lakshmi, Deepa Pai, Kenny Ye, Andreas Buja, Abba Krieger, Seungtai  
462 Yoon, Jennifer Troge, Linda Rodgers, Ivan Iossifov, and Michael Wigler. Rare De Novo and  
463 Transmitted Copy-Number Variation in Autistic Spectrum Disorders. *Neuron*, 70(5):886–897,  
464 June 2011.
- 465 [33] Alexander Lex, Nils Gehlenborg, Hendrik Strobel, Romain Vuillemot, and Hanspeter Pfister.  
466 UpSet: Visualization of Intersecting Sets. *IEEE Transactions on Visualization and Computer  
467 Graphics*, 20(12):1983–1992, 12 2014.
- 468 [34] A. Liberzon, A. Subramanian, R. Pinchback, H. Thorvaldsdottir, P. Tamayo, and J. P.  
469 Mesirov. Molecular signatures database (MSigDB) 3.0. *Bioinformatics*, 27(12):1739–1740,  
470 6 2011.
- 471 [35] Arthur Liberzon, Chet Birger, Helga Thorvaldsdóttir, Mahmoud Ghandi, Jill P. Mesirov,  
472 and Pablo Tamayo. The Molecular Signatures Database Hallmark Gene Set Collection. *Cell  
473 Systems*, 1(6):417–425, 12 2015.
- 474 [36] Anath C. Lionel, Kristiina Tammimies, Andrea K. Vaags, Jill A. Rosenfeld, Joo Wook  
475 Ahn, Daniele Merico, Abdul Noor, Cassandra K. Runke, Vamsee K. Pillalamarri, Melissa T.  
476 Carter, Matthew J. Gazzellone, Bhooma Thiruvahindrapuram, Christina Fagerberg, Lone W.  
477 Laulund, Giovanna Pellecchia, Sylvia Lamoureux, Charu Deshpande, Jill Clayton-Smith,  
478 Ann C. White, Susan Leather, John Trounce, H. Melanie Bedford, Eli Hatchwell, Peggy S. Eis,  
479 Ryan K. C. Yuen, Susan Walker, Mohammed Uddin, Michael T. Geraghty, Sarah M. Nikkel,  
480 Eva M. Tomiak, Bridget A. Fernandez, Noam Soreni, Jennifer Crosbie, Paul D. Arnold, Rus-  
481 sell J. Schachar, Wendy Roberts, Andrew D. Paterson, Joyce So, Peter Szatmari, Christina  
482 Chrysler, Marc Woodbury-Smith, R. Brian Lowry, Lonnie Zwaigenbaum, Divya Mandyam,  
483 John Wei, Jeffrey R. Macdonald, Jennifer L. Howe, Thomas Nalpathamkalam, Zhuozhi Wang,  
484 Daniel Tolson, David S. Cobb, Timothy M. Wilks, Mark J. Sorensen, Patricia I. Bader, Yu An,  
485 Bai-Lin Wu, Sebastiano Antonino Musumeci, Corrado Romano, Diana Postorivo, Anna M.  
486 Nardone, Matteo Della Monica, Giocchino Scarano, Leonardo Zoccante, Francesca Novara,  
487 Orsetta Zuffardi, Roberto Ciccone, Vincenzo Antona, Massimo Carella, Leopoldo Zelante,  
488 Pietro Cavalli, Carlo Poggiani, Ugo Cavallari, Bob Argiropoulos, Judy Chernos, Charlotte  
489 Brasch-Andersen, Marsha Speevak, Marco Fichera, Caroline Mackie Ogilvie, Yiping Shen,  
490 Jennelle C. Hodge, Michael E. Talkowski, Dimitri J. Stavropoulos, Christian R. Marshall,  
491 and Stephen W. Scherer. Disruption of the ASTN2/TRIM32 locus at 9q33.1 is a risk factor  
492 in males for autism spectrum disorders, ADHD and other neurodevelopmental phenotypes.  
493 *Human Molecular Genetics*, 23(10):2752–2768, May 2014.
- 494 [37] M I Love, W Huber, and S Anders. Moderated estimation of fold change and dispersion for  
495 RNA-seq data with DESeq2. *Genome Biology*, 15(12):550, 2014.
- 496 [38] Judith H Miles. Autism spectrum disorders—a genetics review. *Genetics in medicine : official  
497 journal of the American College of Medical Genetics*, 13(4):278–294, 4 2011.
- 498 [39] Shingo Miyauchi and Irina Voineagu. Autism susceptibility genes and the transcriptional  
499 landscape of the human brain. *International review of neurobiology*, 113:303–318, 2013.
- 500 [40] Ching Moey, Susan J Hinze, Louise Brueton, Jenny Morton, Dominic J McMullan, Benjamin  
501 Kamien, Christopher P Barnett, Nicola Brunetti-Pierri, Jillian Nicholl, Jozef Gecz, and Cheryl  
502 Shoubridge. Xp11.2 microduplications including IQSEC2, TSPYL2 and KDM5C genes in  
503 patients with neurodevelopmental disorders. *European Journal of Human Genetics*, 24(3):373–  
504 380, 3 2016.
- 505 [41] Frederick Mosteller and R. A. Fisher. Questions and Answers. *The American Statistician*,  
506 2(5):30–31, 1948.
- 507 [42] L. F. Ning, Y. Q. Yu, E. T. GuoJi, C. G. Kou, Y. H. Wu, J. P. Shi, L. Z. Ai, and Q. Yu. Meta-  
508 analysis of differentially expressed genes in autism based on gene expression data. *Genetics  
509 and molecular research: GMR*, 14(1):2146–2155, March 2015.
- 510 [43] R Patro, G Duggal, M I Love, R A Irizarry, and C Kingsford. Salmon provides fast and  
511 bias-aware quantification of transcript expression. *Nature Methods*, 14(4):417–419, 2017.

- 512 [44] Elise B Robinson, Paul Lichtenstein, Henrik Anckarsäter, Francesca Happé, and Angelica  
513 Ronald. Examining and interpreting the female protective effect against autistic behavior. *Pro-*  
514 *ceedings of the National Academy of Sciences of the United States of America*, 110(13):5258–62,  
515 3 2013.
- 516 [45] Tewarit Sarachana, Rulun Zhou, Guang Chen, Hussein K. Manji, and Valerie W. Hu. In-  
517 vestigation of post-transcriptional gene regulatory networks associated with autism spectrum  
518 disorders by microRNA expression profiling of lymphoblastoid cell lines. *Genome Medicine*,  
519 2(4):23, April 2010.
- 520 [46] Gordon K. Smyth. Linear models and empirical bayes methods for assessing differential  
521 expression in microarray experiments. *Statistical Applications in Genetics and Molecular*  
522 *Biology*, 3:Article3, 2004.
- 523 [47] A. Subramanian, P. Tamayo, V. K. Mootha, S. Mukherjee, B. L. Ebert, M. A. Gillette,  
524 A. Paulovich, S. L. Pomeroy, T. R. Golub, E. S. Lander, and J. P. Mesirov. Gene set enrich-  
525 ment analysis: A knowledge-based approach for interpreting genome-wide expression profiles.  
526 *Proceedings of the National Academy of Sciences*, 102(43):15545–15550, 2005.
- 527 [48] Aravind Subramanian, Pablo Tamayo, Vamsi K. Mootha, Sayan Mukherjee, Benjamin L.  
528 Ebert, Michael A. Gillette, Amanda Paulovich, Scott L. Pomeroy, Todd R. Golub, Eric S.  
529 Lander, and Jill P. Mesirov. Gene set enrichment analysis: A knowledge-based approach for  
530 interpreting genome-wide expression profiles. *Proceedings of the National Academy of Sciences*,  
531 102(43):15545–15550, October 2005.
- 532 [49] The Gene Ontology Consortium. Expansion of the Gene Ontology knowledgebase and re-  
533 sources. *Nucleic Acids Research*, 45(D1):D331–D338, 1 2017.
- 534 [50] Daniah Trabzuni, Adaikalavan Ramasamy, Sabaena Imran, Robert Walker, Colin Smith,  
535 Michael E. Weale, John Hardy, Mina Ryten, and North American Brain Expression Con-  
536 sortium. Widespread sex differences in gene expression and splicing in the adult human brain.  
537 *Nature Communications*, 4:2771, 11 2013.
- 538 [51] George C. Tseng, Debashis Ghosh, and Eleanor Feingold. Comprehensive literature review and  
539 statistical considerations for microarray meta-analysis. *Nucleic Acids Research*, 40(9):3785–  
540 3799, May 2012.
- 541 [52] Daniel S. Tylee, Alfred J. Espinoza, Jonathan L. Hess, Muhammad A. Tahir, Sarah Y. McCoy,  
542 Joshua K. Rim, Totadri Dhimal, Ori S. Cohen, and Stephen J. Glatt. RNA sequencing  
543 of transformed lymphoblastoid cells from siblings discordant for autism spectrum disorders  
544 reveals transcriptomic and functional alterations: Evidence for sex-specific effects. *Autism*  
545 *Research*, 10(3):439–455, 3 2017.
- 546 [53] Daniel S. Tylee, Jonathan L. Hess, Thomas P. Quinn, Rahul Barve, Hailiang Huang, Yanli  
547 Zhang-James, Jeffrey Chang, Boryana S. Stamova, Frank R. Sharp, Irva Hertz-Picciotto,  
548 Stephen V. Faraone, Sek Won Kong, and Stephen J. Glatt. Blood transcriptomic comparison  
549 of individuals with and without autism spectrum disorder: A combined-samples mega-analysis.  
550 *American Journal of Medical Genetics. Part B, Neuropsychiatric Genetics: The Official Pub-*  
551 *lication of the International Society of Psychiatric Genetics*, 174(3):181–201, April 2017.
- 552 [54] Daniel S. Tylee, Jonathan L. Hess, Thomas P. Quinn, Rahul Barve, Hailiang Huang, Yanli  
553 Zhang-James, Jeffrey Chang, Boryana S. Stamova, Frank R. Sharp, Irva Hertz-Picciotto,  
554 Stephen V. Faraone, Sek Won Kong, and Stephen J. Glatt. Blood transcriptomic comparison  
555 of individuals with and without autism spectrum disorder: A combined-samples mega-analysis.  
556 *American Journal of Medical Genetics Part B: Neuropsychiatric Genetics*, 174(3):181–201, 4  
557 2017.
- 558 [55] Daniel S. Tylee, Daniel M. Kawaguchi, and Stephen J. Glatt. On the outside, looking in:  
559 a review and evaluation of the comparability of blood and brain "-omes". *American Jour-*  
560 *nal of Medical Genetics. Part B, Neuropsychiatric Genetics: The Official Publication of the*  
561 *International Society of Psychiatric Genetics*, 162B(7):595–603, October 2013.

- 562 [56] Donna M. Werling, Neelroop N. Parikshak, and Daniel H. Geschwind. Gene expression in  
563 human brain implicates sexually dimorphic pathways in autism spectrum disorders. *Nature*  
564 *Communications*, 7:10717, 2 2016.
- 565 [57] C Wright, J H Shin, A Rajpurohit, A Deep-Soboslay, L Collado-Torres, N J Brandon, T M  
566 Hyde, J E Kleinman, A E Jaffe, A J Cross, and D R Weinberger. Altered expression of  
567 histamine signaling genes in autism spectrum disorder. *Translational psychiatry*, 7(5):e1126,  
568 5 2017.

## 569 List of Figures

|     |   |                                                                                                                                                                                                                                                                                                                                                                                                                                                                                                                                                                                                                                             |    |
|-----|---|---------------------------------------------------------------------------------------------------------------------------------------------------------------------------------------------------------------------------------------------------------------------------------------------------------------------------------------------------------------------------------------------------------------------------------------------------------------------------------------------------------------------------------------------------------------------------------------------------------------------------------------------|----|
| 570 | 1 | These violin plots show the base-2 logarithm-transformed expression for the two transcripts with the largest interaction effect from the RNA-Seq data (i.e., those with the smallest corrected p-value). The solid lines show sex-specific mean expression differences. The dashed line shows the sex-independent (i.e., pooled) mean expression difference. . . . .                                                                                                                                                                                                                                                                        | 14 |
| 571 |   |                                                                                                                                                                                                                                                                                                                                                                                                                                                                                                                                                                                                                                             |    |
| 572 |   |                                                                                                                                                                                                                                                                                                                                                                                                                                                                                                                                                                                                                                             |    |
| 573 |   |                                                                                                                                                                                                                                                                                                                                                                                                                                                                                                                                                                                                                                             |    |
| 574 |   |                                                                                                                                                                                                                                                                                                                                                                                                                                                                                                                                                                                                                                             |    |
| 575 | 2 | This figure shows the genes with the most significant sex-dependent dysregulation (i.e., a sex-autism interaction) according to the meta-analysis of the microarray data. Above, the bar plot shows the $\chi^2$ score for each gene as calculated using Fisher's method (where the dark bars indicate that the gene has an FDR-adjusted p-value < 0.05). Below, the dot plot shows whether a gene showed a nominally significant sex-dependent dysregulation at an unadjusted p-value < 0.05 for a given study. Note that most genes selected for by the meta-analysis show at least nominal significance across multiple studies. . . . . | 15 |
| 576 |   |                                                                                                                                                                                                                                                                                                                                                                                                                                                                                                                                                                                                                                             |    |
| 577 |   |                                                                                                                                                                                                                                                                                                                                                                                                                                                                                                                                                                                                                                             |    |
| 578 |   |                                                                                                                                                                                                                                                                                                                                                                                                                                                                                                                                                                                                                                             |    |
| 579 |   |                                                                                                                                                                                                                                                                                                                                                                                                                                                                                                                                                                                                                                             |    |
| 580 |   |                                                                                                                                                                                                                                                                                                                                                                                                                                                                                                                                                                                                                                             |    |
| 581 |   |                                                                                                                                                                                                                                                                                                                                                                                                                                                                                                                                                                                                                                             |    |
| 582 |   |                                                                                                                                                                                                                                                                                                                                                                                                                                                                                                                                                                                                                                             |    |
| 583 | 3 | These violin plots show base-2 logarithm-transformed expression for the two most significant main effects (i.e., of the ASD condition) from the RNA-Seq data. The solid lines show sex-specific mean expression differences. The dashed line shows the sex-independent (i.e., pooled) mean expression difference. . . . .                                                                                                                                                                                                                                                                                                                   | 16 |
| 584 |   |                                                                                                                                                                                                                                                                                                                                                                                                                                                                                                                                                                                                                                             |    |
| 585 |   |                                                                                                                                                                                                                                                                                                                                                                                                                                                                                                                                                                                                                                             |    |
| 586 |   |                                                                                                                                                                                                                                                                                                                                                                                                                                                                                                                                                                                                                                             |    |
| 587 | 4 | This figure shows the genes with the most significant sex-independent main effects (i.e., of the ASD condition) according to the meta-analysis of the microarray data. Above, the bar plot shows the $\chi^2$ score for each gene as calculated using Fisher's method (where the dark bars indicate that the gene has an FDR-adjusted p-value < 0.05). Below, the dot plot shows whether a gene showed a nominally significant sex-independent main effect at an unadjusted p-value < 0.05 for a given study. Note that most genes selected for by the meta-analysis show at least nominal significance across multiple studies. . . . .    | 17 |
| 588 |   |                                                                                                                                                                                                                                                                                                                                                                                                                                                                                                                                                                                                                                             |    |
| 589 |   |                                                                                                                                                                                                                                                                                                                                                                                                                                                                                                                                                                                                                                             |    |
| 590 |   |                                                                                                                                                                                                                                                                                                                                                                                                                                                                                                                                                                                                                                             |    |
| 591 |   |                                                                                                                                                                                                                                                                                                                                                                                                                                                                                                                                                                                                                                             |    |
| 592 |   |                                                                                                                                                                                                                                                                                                                                                                                                                                                                                                                                                                                                                                             |    |
| 593 |   |                                                                                                                                                                                                                                                                                                                                                                                                                                                                                                                                                                                                                                             |    |
| 594 |   |                                                                                                                                                                                                                                                                                                                                                                                                                                                                                                                                                                                                                                             |    |
| 595 | 5 | This dot plot shows results from a GSEA of the RNA-Seq data against the MSigDB KEGG pathways. For the two sets of results (i.e., the sex-autism interaction and the main effect), a KEGG pathway (y-axis) has a circle (or triangle) if it is enriched (or depleted). The size of the points indicates the absolute normalised enrichment score. The colour indicates the FDR. Note that only points with an FDR < 0.3 are plotted (see Methods). . . . .                                                                                                                                                                                   | 18 |
| 596 |   |                                                                                                                                                                                                                                                                                                                                                                                                                                                                                                                                                                                                                                             |    |
| 597 |   |                                                                                                                                                                                                                                                                                                                                                                                                                                                                                                                                                                                                                                             |    |
| 598 |   |                                                                                                                                                                                                                                                                                                                                                                                                                                                                                                                                                                                                                                             |    |
| 599 |   |                                                                                                                                                                                                                                                                                                                                                                                                                                                                                                                                                                                                                                             |    |
| 600 |   |                                                                                                                                                                                                                                                                                                                                                                                                                                                                                                                                                                                                                                             |    |
| 601 | 6 | This dot plot shows results from a GSEA of the meta-analysis data against the MSigDB KEGG pathways. For the two sets of results (i.e., the sex-autism interaction and the main effect), a KEGG pathway (y-axis) has a circle if it is enriched. The size of the points indicates the absolute normalised enrichment score. The colour indicates the FDR. Note that only points with an FDR < 0.3 are plotted (see Methods). . . . .                                                                                                                                                                                                         | 19 |
| 602 |   |                                                                                                                                                                                                                                                                                                                                                                                                                                                                                                                                                                                                                                             |    |
| 603 |   |                                                                                                                                                                                                                                                                                                                                                                                                                                                                                                                                                                                                                                             |    |
| 604 |   |                                                                                                                                                                                                                                                                                                                                                                                                                                                                                                                                                                                                                                             |    |
| 605 |   |                                                                                                                                                                                                                                                                                                                                                                                                                                                                                                                                                                                                                                             |    |
| 606 |   |                                                                                                                                                                                                                                                                                                                                                                                                                                                                                                                                                                                                                                             |    |
| 607 | 7 | This UpSet plot [33] shows set intersections (and their sizes) from a GSEA of four results against the MSigDB KEGG pathways. Set identity is indicated by the joined lines. Set size is indicated by the top bar chart. The bar chart on the left shows the total set size for each individual GSEA run. Results are filtered using a liberal FDR threshold of FDR < 0.15 for the RNA-Seq data and FDR < 0.3 for the meta-analysis data (see Methods). . . . .                                                                                                                                                                              | 20 |
| 608 |   |                                                                                                                                                                                                                                                                                                                                                                                                                                                                                                                                                                                                                                             |    |
| 609 |   |                                                                                                                                                                                                                                                                                                                                                                                                                                                                                                                                                                                                                                             |    |
| 610 |   |                                                                                                                                                                                                                                                                                                                                                                                                                                                                                                                                                                                                                                             |    |
| 611 |   |                                                                                                                                                                                                                                                                                                                                                                                                                                                                                                                                                                                                                                             |    |
| 612 |   |                                                                                                                                                                                                                                                                                                                                                                                                                                                                                                                                                                                                                                             |    |



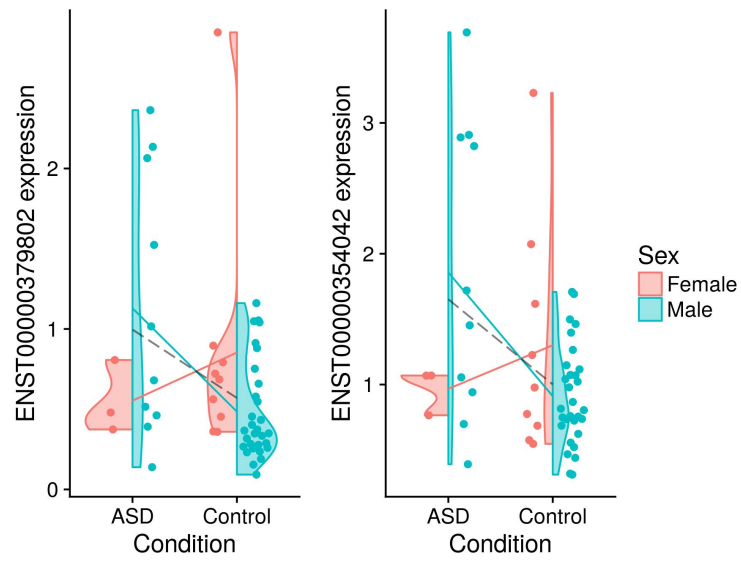

Figure 1: These violin plots show the base-2 logarithm-transformed expression for the two transcripts with the largest interaction effect from the RNA-Seq data (i.e., those with the smallest corrected p-value). The solid lines show sex-specific mean expression differences. The dashed line shows the sex-independent (i.e., pooled) mean expression difference.

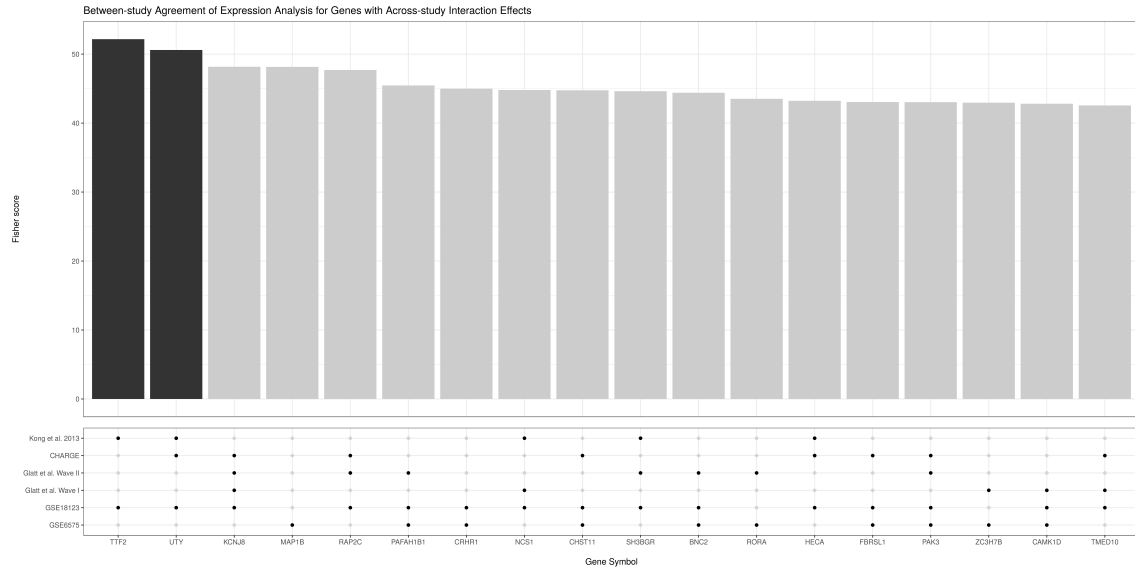

Figure 2: This figure shows the genes with the most significant sex-dependent dysregulation (i.e., a sex-autism interaction) according to the meta-analysis of the microarray data. Above, the bar plot shows the  $\chi^2$  score for each gene as calculated using Fisher's method (where the dark bars indicate that the gene has an FDR-adjusted p-value < 0.05). Below, the dot plot shows whether a gene showed a nominally significant sex-dependent dysregulation at an unadjusted p-value < 0.05 for a given study. Note that most genes selected for by the meta-analysis show at least nominal significance across multiple studies.

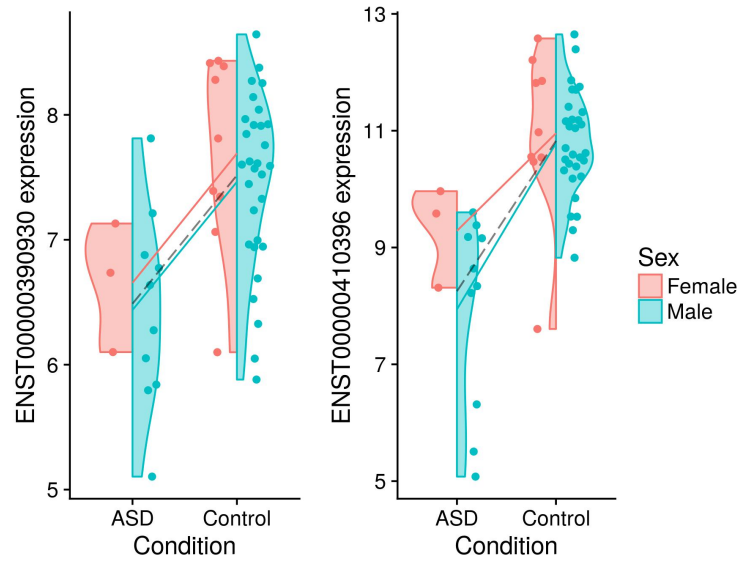

Figure 3: These violin plots show base-2 logarithm-transformed expression for the two most significant main effects (i.e., of the ASD condition) from the RNA-Seq data. The solid lines show sex-specific mean expression differences. The dashed line shows the sex-independent (i.e., pooled) mean expression difference.

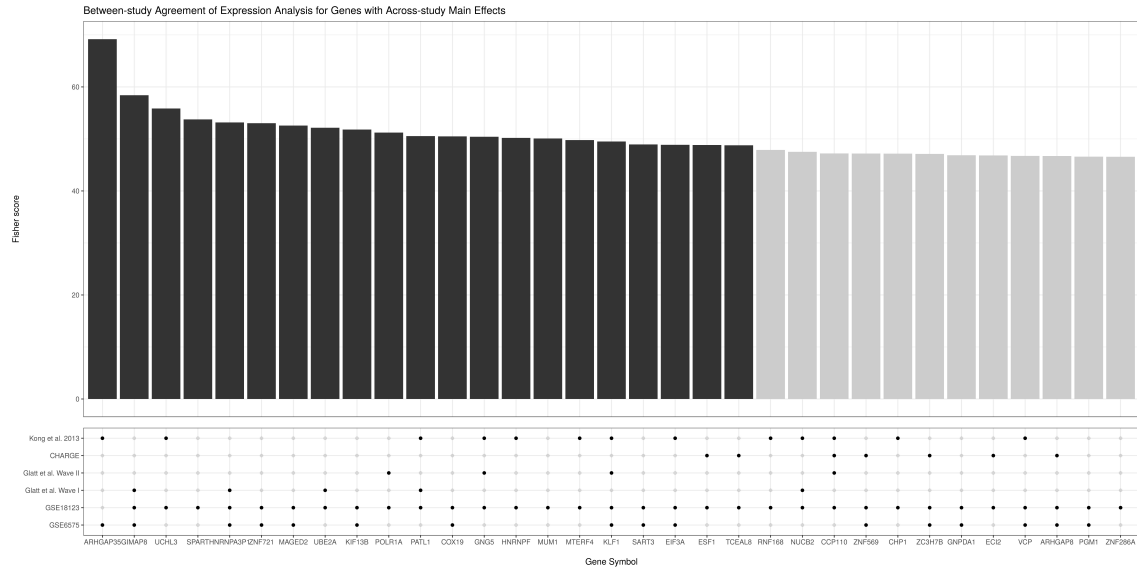

Figure 4: This figure shows the genes with the most significant sex-independent main effects (i.e., of the ASD condition) according to the meta-analysis of the microarray data. Above, the bar plot shows the  $\chi^2$  score for each gene as calculated using Fisher's method (where the dark bars indicate that the gene has an FDR-adjusted p-value < 0.05). Below, the dot plot shows whether a gene showed a nominally significant sex-independent main effect at an unadjusted p-value < 0.05 for a given study. Note that most genes selected for by the meta-analysis show at least nominal significance across multiple studies.

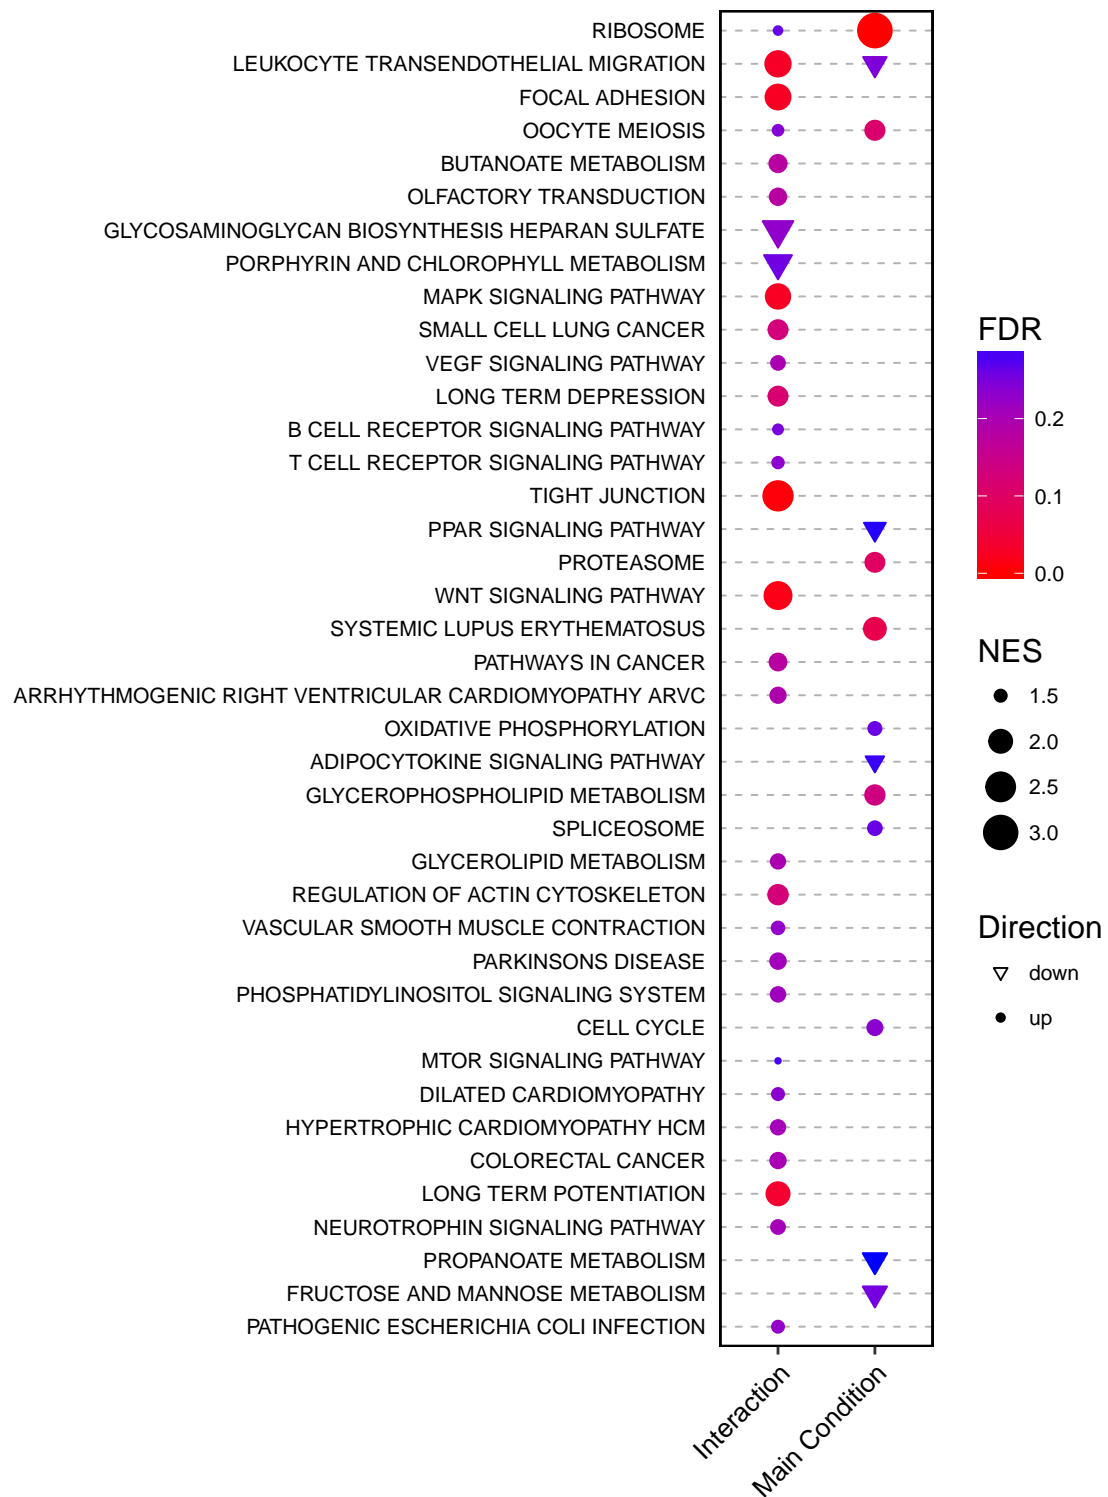

Figure 5: This dot plot shows results from a GSEA of the RNA-Seq data against the MSigDB KEGG pathways. For the two sets of results (i.e., the sex-autism interaction and the main effect), a KEGG pathway (y-axis) has a circle (or triangle) if it is enriched (or depleted). The size of the points indicates the absolute normalised enrichment score. The colour indicates the FDR. Note that only points with an FDR < 0.3 are plotted (see Methods).



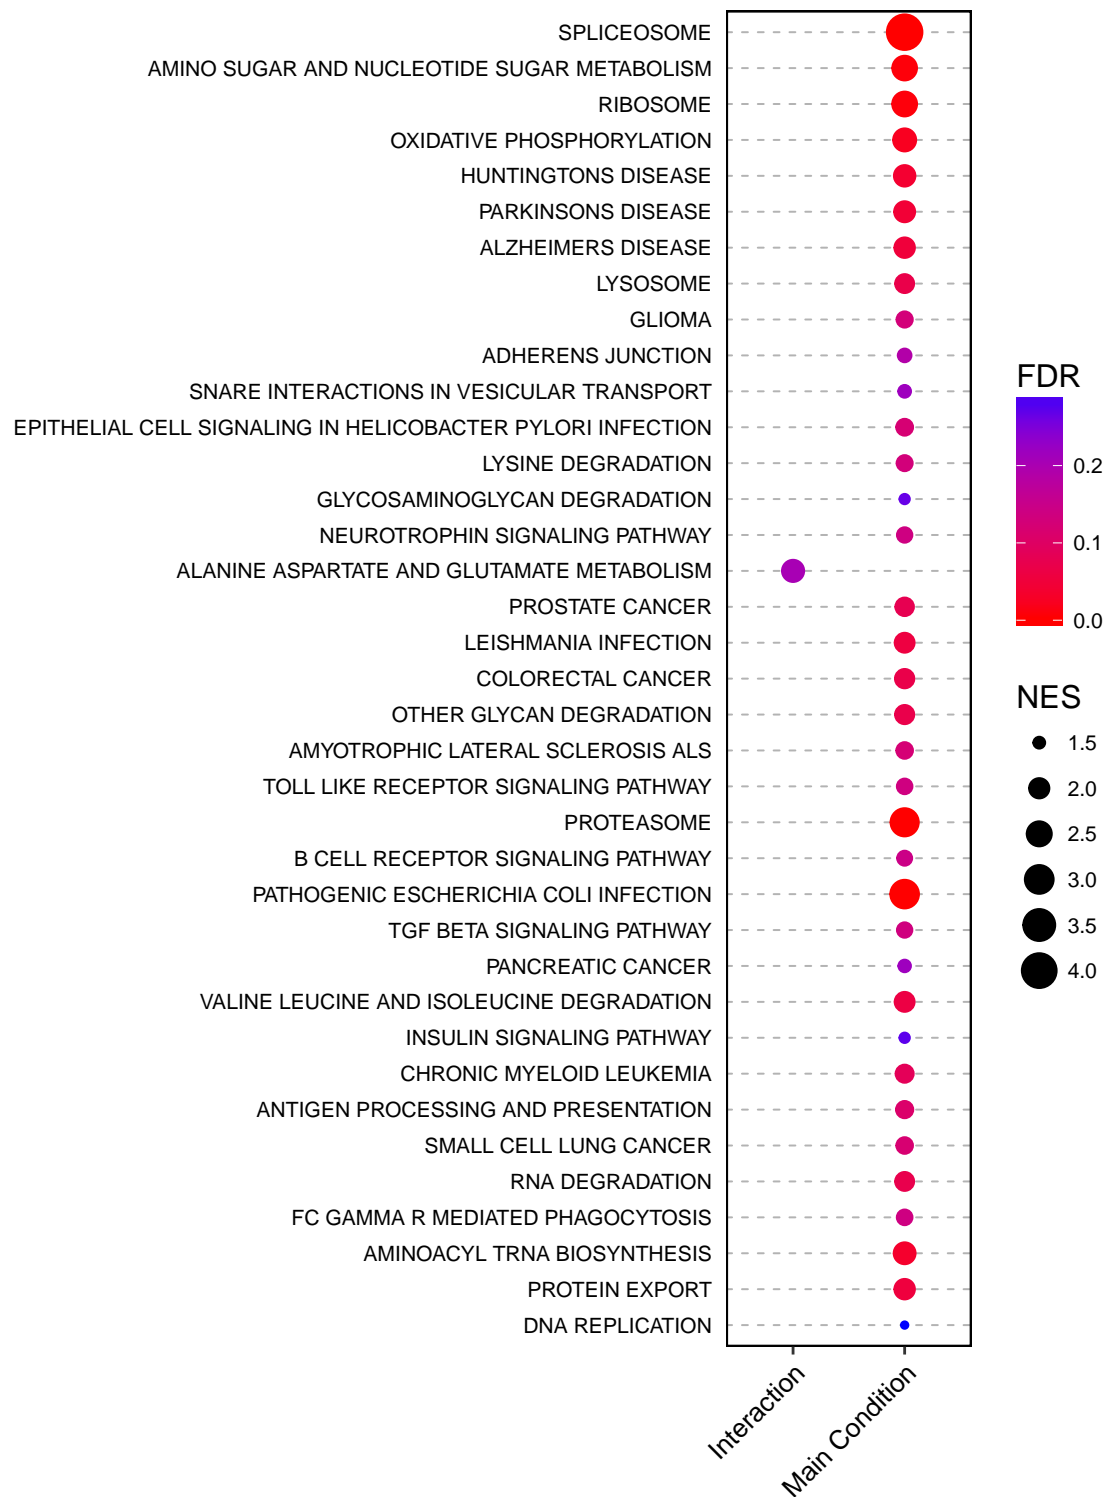

Figure 6: This dot plot shows results from a GSEA of the meta-analysis data against the MSigDB KEGG pathways. For the two sets of results (i.e., the sex-autism interaction and the main effect), a KEGG pathway (y-axis) has a circle if it is enriched. The size of the points indicates the absolute normalised enrichment score. The colour indicates the FDR. Note that only points with an FDR < 0.3 are plotted (see Methods).

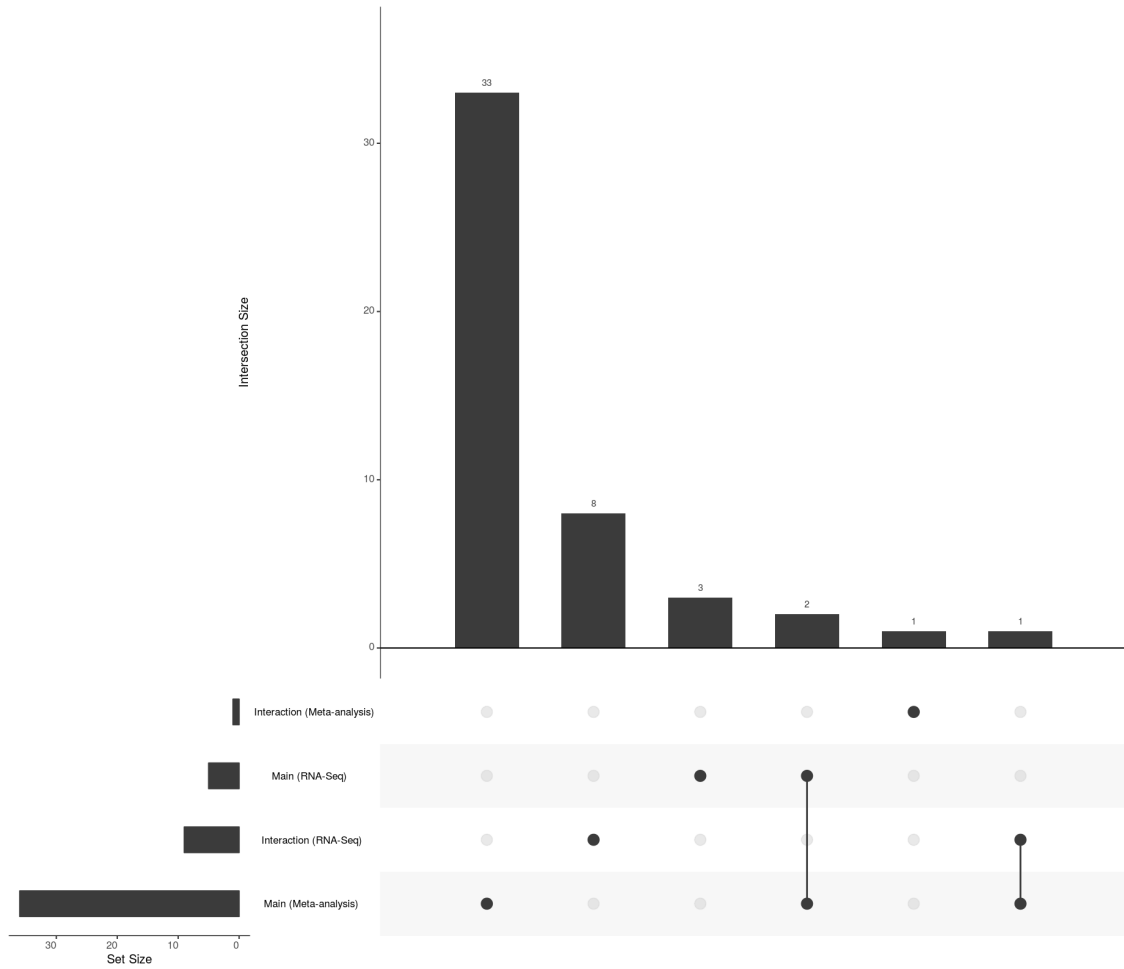

Figure 7: This UpSet plot [33] shows set intersections (and their sizes) from a GSEA of four results against the MSigDB KEGG pathways. Set identity is indicated by the joined lines. Set size is indicated by the top bar chart. The bar chart on the left shows the total set size for each individual GSEA run. Results are filtered using a liberal FDR threshold of  $FDR < 0.15$  for the RNA-Seq data and  $FDR < 0.3$  for the meta-analysis data (see Methods).

## 613 List of Tables

|     |   |                                                                                                                                                                                                                                                                                                                                                                                     |    |
|-----|---|-------------------------------------------------------------------------------------------------------------------------------------------------------------------------------------------------------------------------------------------------------------------------------------------------------------------------------------------------------------------------------------|----|
| 614 | 1 | This table details all studies included in the meta-analysis, and the number of probes available after establishing a final probe set. All subjects with a labelled condition other than typically developed (TD) were assigned to the autism spectrum disorder (ASD) group, except for the two Glatt et al. data sets where “Type-1 errors” were assigned to the TD group. . . . . | 22 |
| 615 |   |                                                                                                                                                                                                                                                                                                                                                                                     |    |
| 616 |   |                                                                                                                                                                                                                                                                                                                                                                                     |    |
| 617 |   |                                                                                                                                                                                                                                                                                                                                                                                     |    |
| 618 |   |                                                                                                                                                                                                                                                                                                                                                                                     |    |
| 619 | 2 | This table shows SVA-adjusted results for the sex-autism interaction for the RNA-Seq data (sorted by FDR-adjusted p-value). Note that FDR-adjusted p-values are also shown for an analysis performed without the adjustment of latent batch effects.                                                                                                                                | 23 |
| 620 |   |                                                                                                                                                                                                                                                                                                                                                                                     |    |
| 621 |   |                                                                                                                                                                                                                                                                                                                                                                                     |    |
| 622 | 3 | This table shows genes with the most sex-dependent dysregulation (and their chromosomal position), sorted by Fisher score and adjusted p-value. In addition, this table shows the Fisher score and adjusted p-value calculated for an analysis repeated without the adjustment of latent batch effects. . . . .                                                                     | 24 |
| 623 |   |                                                                                                                                                                                                                                                                                                                                                                                     |    |
| 624 |   |                                                                                                                                                                                                                                                                                                                                                                                     |    |
| 625 |   |                                                                                                                                                                                                                                                                                                                                                                                     |    |
| 626 | 4 | This table shows SVA-adjusted results for the main effects (i.e., of the ASD condition) for the RNA-Seq data (sorted by FDR-adjusted p-value). Note that FDR-adjusted p-values are also shown for an analysis performed without the adjustment of latent batch effects. . . . .                                                                                                     | 25 |
| 627 |   |                                                                                                                                                                                                                                                                                                                                                                                     |    |
| 628 |   |                                                                                                                                                                                                                                                                                                                                                                                     |    |
| 629 |   |                                                                                                                                                                                                                                                                                                                                                                                     |    |
| 630 | 5 | This table shows genes with the most sex-independent dysregulation (and their chromosomal position), sorted by Fisher score and adjusted p-value. In addition, this table shows the Fisher score and adjusted p-value calculated for an analysis repeated without the adjustment of latent batch effects. . . . .                                                                   | 26 |
| 631 |   |                                                                                                                                                                                                                                                                                                                                                                                     |    |
| 632 |   |                                                                                                                                                                                                                                                                                                                                                                                     |    |
| 633 |   |                                                                                                                                                                                                                                                                                                                                                                                     |    |

| Study ID             | Probes (Intersect) | Females (TD) | Males (TD) | Females (ASD) | Males (ASD) |
|----------------------|--------------------|--------------|------------|---------------|-------------|
| GSE6575              | 39561              | 3            | 9          | 8             | 36          |
| GSE18123             | 19532              | 34           | 48         | 24            | 80          |
| Glatt et al. Wave I  | 28424              | 28           | 40         | 23            | 88          |
| Glatt et al. Wave II | 28424              | 35           | 56         | 28            | 85          |
| CHARGE               | 39561              | 15           | 75         | 15            | 103         |
| Kong et al. 2013     | 19532              | 7            | 10         | 7             | 46          |

Table 1: This table details all studies included in the meta-analysis, and the number of probes available after establishing a final probe set. All subjects with a labelled condition other than typically developed (TD) were assigned to the autism spectrum disorder (ASD) group, except for the two Glatt et al. data sets where “Type-1 errors” were assigned to the TD group.

| Transcript ID   | Gene symbol | Transcript biotype | Log 2 FC | P-adj SVA | P-adj (no SVA) |
|-----------------|-------------|--------------------|----------|-----------|----------------|
| ENST00000354042 | SLC13A4     | protein_coding     | 3.27     | 0.293     | 0.1136846      |
| ENST00000379802 | DSP         | protein_coding     | 3.19     | 0.293     | 0.6534814      |
| ENST00000262551 | OGN         | protein_coding     | 2.97     | 0.299     | 0.8169099      |
| ENST00000371625 | PTGDS       | protein_coding     | 1.74     | 0.299     | 0.0329544      |
| ENST00000223357 | AEBP1       | protein_coding     | 1.85     | 0.529     | 0.8713166      |

Table 2: This table shows SVA-adjusted results for the sex-autism interaction for the RNA-Seq data (sorted by FDR-adjusted p-value). Note that FDR-adjusted p-values are also shown for an analysis performed without the adjustment of latent batch effects.



|          | Location     | Fisher   | Fisher p-adj | Fisher (no SVA) | Fisher p-adj (noSVA) |
|----------|--------------|----------|--------------|-----------------|----------------------|
| TTF2     | 1p13.1       | 52.16404 | 0.0105053    | 28.88686        | 1.0000000            |
| UTY      | Yq11.221     | 50.59543 | 0.0198876    | 45.76688        | 0.1378710            |
| KCNJ8    | 12p12.1      | 48.17048 | 0.0528841    | 38.16932        | 1.0000000            |
| MAP1B    | 5q13.2       | 48.15632 | 0.0531822    | 47.94878        | 0.0578051            |
| RAP2C    | Xq26.2       | 47.70446 | 0.0637312    | 24.82099        | 1.0000000            |
| PAFAH1B1 | 17p13.3      | 45.45517 | 0.1559409    | 17.84249        | 1.0000000            |
| CRHR1    | 17q21.31     | 44.98624 | 0.1876599    | 43.46097        | 0.3416423            |
| NCS1     | 9q34.11      | 44.79693 | 0.2021903    | 30.46521        | 1.0000000            |
| CHST11   | 12q23.3      | 44.75342 | 0.2056750    | 21.19593        | 1.0000000            |
| SH3BGR   | 21q22.2      | 44.61154 | 0.2174809    | 32.59585        | 1.0000000            |
| BNC2     | 9p22.3-p22.2 | 44.40363 | 0.2360031    | 39.81245        | 1.0000000            |
| RORA     | 15q22.2      | 43.52113 | 0.3335702    | 34.11125        | 1.0000000            |
| HECA     | 6q24.1       | 43.22311 | 0.3747481    | 33.12178        | 1.0000000            |
| FBRSL1   | 12q24.33     | 43.04625 | 0.4015007    | 35.53452        | 1.0000000            |
| PAK3     | Xq23         | 43.03339 | 0.4034965    | 43.20181        | 0.3780235            |
| ZC3H7B   | 22q13.2      | 42.95711 | 0.4156536    | 35.03776        | 1.0000000            |
| CAMK1D   | 10p13        | 42.80430 | 0.4411269    | 24.56439        | 1.0000000            |
| TMED10   | 14q24.3      | 42.55614 | 0.4858196    | 17.45529        | 1.0000000            |

Table 3: This table shows genes with the most sex-dependent dysregulation (and their chromosomal position), sorted by Fisher score and adjusted p-value. In addition, this table shows the Fisher score and adjusted p-value calculated for an analysis repeated without the adjustment of latent batch effects.

| Transcript ID   | Gene symbol | Transcript biotype | Log 2 FC | P-adj (SVA) | P-adj (no SVA) |
|-----------------|-------------|--------------------|----------|-------------|----------------|
| ENST00000390930 | SNORD17     | snoRNA             | -2.98    | 1.54e-05    | 0.0000102      |
| ENST00000410396 | RNU2-2P     | snRNA              | -4.76    | 4.04e-05    | 0.0000000      |
| ENST00000613119 |             | snRNA              | -3.23    | 9.18e-05    | 0.0000000      |
| ENST00000258526 | PLXNC1      | protein_coding     | 0.48     | 0.00468     | 0.4273372      |
| ENST00000393775 | IGSF11      | protein_coding     | -1.18    | 0.00468     | 1.0000000      |
| ENST00000459255 | SCARNA10    | snoRNA             | -1.71    | 0.00468     | 0.0014803      |
| ENST00000618786 | RN7SL1      | misc_RNA           | -1.35    | 0.0124      | 0.0026454      |

Table 4: This table shows SVA-adjusted results for the main effects (i.e., of the ASD condition) for the RNA-Seq data (sorted by FDR-adjusted p-value). Note that FDR-adjusted p-values are also shown for an analysis performed without the adjustment of latent batch effects.

|           | Location | Fisher   | Fisher p-adj | Fisher (no SVA) | Fisher p-adj (noSVA) |
|-----------|----------|----------|--------------|-----------------|----------------------|
| ARHGAP35  | 19q13.32 | 69.17663 | 0.0000083    | 59.97651        | 0.0004125            |
| GIMAP8    | 7q36.1   | 58.39735 | 0.0008000    | 52.71485        | 0.0083436            |
| UCHL3     | 13q22.2  | 55.85012 | 0.0023073    | 31.88589        | 1.0000000            |
| SPART     | 13q13.3  | 53.75888 | 0.0054659    | 43.79029        | 0.2920570            |
| HNRNPA3P1 | 10q11.21 | 53.16493 | 0.0069742    | 54.55326        | 0.0039291            |
| ZNF721    | 4p16.3   | 53.02620 | 0.0073817    | 45.32102        | 0.1608751            |
| MAGED2    | Xp11.21  | 52.57098 | 0.0088931    | 31.43801        | 1.0000000            |
| UBE2A     | Xq24     | 52.15816 | 0.0105264    | 24.84369        | 1.0000000            |
| KIF13B    | 8p12     | 51.80723 | 0.0121459    | 44.99172        | 0.1830060            |
| POLR1A    | 2p11.2   | 51.21815 | 0.0154371    | 35.12970        | 1.0000000            |
| PATL1     | 11q12.1  | 50.53892 | 0.0203385    | 37.55012        | 1.0000000            |
| COX19     | 7p22.3   | 50.48910 | 0.0207524    | 51.68452        | 0.0126954            |
| GNG5      | 1p22.3   | 50.42442 | 0.0213024    | 21.04799        | 1.0000000            |
| HNRNPF    | 10q11.21 | 50.20526 | 0.0232786    | 52.19956        | 0.0102957            |
| MUM1      | 19p13.3  | 50.09134 | 0.0243757    | 38.59229        | 1.0000000            |
| MTERF4    | 2q37.3   | 49.77445 | 0.0277066    | 40.36576        | 1.0000000            |
| KLF1      | 19p13.13 | 49.50019 | 0.0309497    | 35.07655        | 1.0000000            |
| SART3     | 12q23.3  | 48.93549 | 0.0388576    | 51.89275        | 0.0116656            |
| EIF3A     | 10q26.11 | 48.86929 | 0.0399046    | 48.66280        | 0.0429001            |
| ESF1      | 20p12.1  | 48.82351 | 0.0406442    | 40.26756        | 1.0000000            |
| TCEAL8    | Xq22.1   | 48.76924 | 0.0415389    | 30.32699        | 1.0000000            |
| RNF168    | 3q29     | 47.89156 | 0.0590766    | 40.39014        | 1.0000000            |
| NUCB2     | 11p15.1  | 47.52251 | 0.0684739    | 46.57846        | 0.0981743            |
| CCP110    | 16p12.3  | 47.21328 | 0.0774723    | 30.63996        | 1.0000000            |
| ZNF569    | 19q13.12 | 47.18319 | 0.0784042    | 35.01402        | 1.0000000            |
| CHP1      | 15q15.1  | 47.17381 | 0.0786939    | 46.71912        | 0.0928712            |
| ZC3H7B    | 22q13.2  | 47.11959 | 0.0804103    | 31.75604        | 1.0000000            |
| GNPDA1    | 5q31.3   | 46.86648 | 0.0889439    | 39.70348        | 1.0000000            |
| ECI2      | 6p25.2   | 46.83204 | 0.0901676    | 54.27612        | 0.0044030            |
| VCP       | 9p13.3   | 46.73363 | 0.0937667    | 33.68338        | 1.0000000            |
| ARHGAP8   | 22q13.31 | 46.70772 | 0.0947338    | 50.13461        | 0.0237714            |
| PGM1      | 1p31.3   | 46.58133 | 0.0996154    | 36.39139        | 1.0000000            |
| ZNF286A   | 17p12    | 46.57586 | 0.0998268    | 31.41283        | 1.0000000            |

Table 5: This table shows genes with the most sex-independent dysregulation (and their chromosomal position), sorted by Fisher score and adjusted p-value. In addition, this table shows the Fisher score and adjusted p-value calculated for an analysis repeated without the adjustment of latent batch effects.
